# Supplementary material
Source: PubMed Central journal article supplement (PMC4962540)
Supplement: NIHMS802318-supplement-Supplemental_Data.pdf [file NIHMS802318-supplement-Supplemental_Data.pdf]

Supplemental Table 1. Baseline characteristics of the patients with adrenocortical carcinoma undergoing surgical resection.

| Characteristic                   | Total (n=192)   |
|----------------------------------|-----------------|
| Age, yr, median (IQR)            | 52 (43-62)      |
| Sex                              |                 |
| Female                           | 124 (64.6)      |
| Male                             | 68 (35.4)       |
| Race (n=187)                     |                 |
| White                            | 157 (84.0)      |
| Black                            | 9 (4.8)         |
| Others                           | 21 (11.2)       |
| Size, cm, median (IQR)           | 11.5 (8.0-15.0) |
| Laterality (n=190)               |                 |
| Left                             | 105 (55.3)      |
| Right                            | 85 (44.7)       |
| Capsular invasion (n=135)        |                 |
| No                               | 54 (40.0)       |
| Yes                              | 81 (60.0)       |
| Nodal status                     |                 |
| Negative                         | 42 (21.9)       |
| Positive                         | 18 (9.4)        |
| Not harvested                    | 132 (68.8)      |
| Margin (n=168)                   |                 |
| R0                               | 126 (75.0)      |
| R1                               | 36 (21.4)       |
| R2                               | 6 (3.6)         |
| AJCC T stage (n=192)             |                 |
| T1                               | 11 (6.2)        |
| T2                               | 80 (45.5)       |
| T3                               | 63 (35.8)       |
| T4                               | 22 (12.5)       |
| Mitosis in 50 HPF (n=87)         |                 |
| <5                               | 20 (23.0)       |
| <10                              | 29 (33.3)       |
| >10                              | 38 (43.7)       |
| Secretory status (n=179)         |                 |
| Cortisol                         | 33 (18.4)       |
| Mineralocorticoid                | 10 (5.6)        |
| Nonsecreting                     | 114 (63.7)      |
| Androgens/Estrogens              | 22 (12.3)       |
| Operation approach (n=185)       |                 |
| Open abdominal or posterior      | 125 (67.6)      |
| Minimally invasive Surgery       | 35 (18.9)       |
| Thoracoabdominal Surgery         | 25 (13.5)       |
| Complication (n=137)             | 52 (38.0)       |
| Grade of complications           |                 |
| Grade I and II                   | 34 (65.4)       |
| Grade III and IV                 | 18 (34.6)       |
| Neoadjuvant chemotherapy (n=182) | 2 (1.1)         |
| Adjuvant chemotherapy (n=180)    | 23 (12.8)       |
| Postoperative Mitotane (n=156)   | 57 (36.5)       |

Supplemental Table 2. Univariable and multivariable Cox proportional hazards models showing the association of variables with disease-free survival.

|                        | Univariable |           |         | Multivariable |           |         |
|------------------------|-------------|-----------|---------|---------------|-----------|---------|
|                        | HR          | 95% CI    | P value | HR            | 95% CI    | P value |
| Age                    |             |           |         |               |           |         |
| ≤65                    | Ref         |           |         | -             | -         | -       |
| >65                    | 1.22        | 0.77-1.92 | 0.39    | -             | -         | -       |
| Gender                 |             |           |         |               |           |         |
| Female                 | Ref         |           |         | -             | -         | -       |
| Male                   | 1.06        | 0.74-1.52 | 0.74    | -             | -         | -       |
| Mitotic count in 50HPF |             |           |         |               |           |         |
| ≤10                    | Ref         |           |         | -             | -         | -       |
| >10                    | 1.82        | 1.08-3.08 | 0.02    | -             | -         | -       |
| Surgical margin status |             |           |         |               |           |         |
| R0                     | Ref         |           |         | Ref           |           |         |
| R1/R2                  | 1.82        | 1.21-2.75 | 0.004   | 1.35          | 0.88-2.07 | 0.17    |
| Size                   |             |           |         |               |           |         |
| ≤10cm                  | Ref         |           |         | Ref           |           |         |
| >10cm                  | 1.56        | 1.08-2.26 | 0.02    | 1.28          | 0.86-1.92 | 0.23    |
| Capsular invasion      |             |           |         |               |           |         |
| No                     | Ref         |           |         | Ref           |           |         |
| Yes                    | 2.03        | 1.28-3.21 | 0.002   | 1.65          | 1.02-2.68 | 0.04    |
| T stage                |             |           |         |               |           |         |
| I-II                   | Ref         |           |         | Ref           |           |         |
| III-IV                 | 2.04        | 1.40-2.97 | <0.001  | 1.46          | 0.95-2.25 | 0.08    |
| Functional tumor       |             |           |         |               |           |         |
| No                     | Ref         |           |         | Ref           |           |         |
| Yes                    | 1.62        | 1.12-2.34 | 0.01    | 1.51          | 1.04-2.20 | 0.03    |
